# Supplementary material for: Capillary descent
Source: Royal Society of Chemistry journal article supplement (doi:10.1039/c8sm00453f), 2018-01-01
Supplement: c8sm00453f1.pdf [file c8sm00453f1.pdf]

## Capillary Descent

*Joachim Delannoy, Hélène de Maleprade, Christophe Clanet & David Quéré*

Physique & Mécanique des Milieux Hétérogènes, UMR 7636 du CNRS, ESPCI, 75005 Paris, France.  
LadHyX, UMR 7646 du CNRS, École polytechnique, 91128 Palaiseau, France.

### Supplementary Information

#### Aerophilic coating

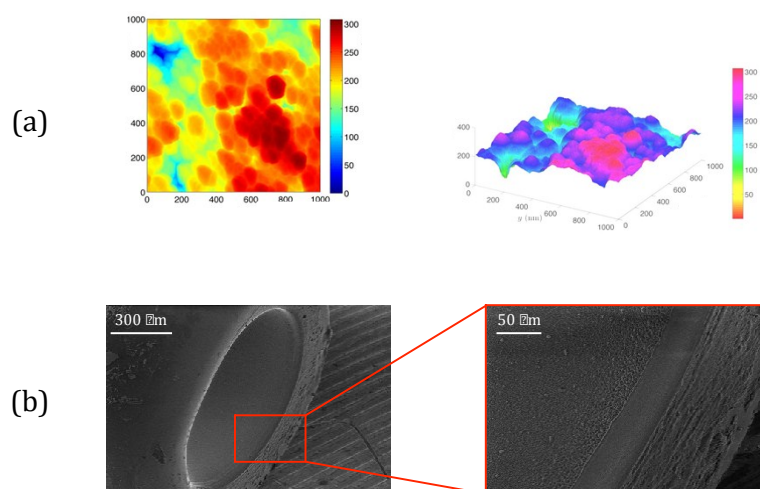

**Figure SI1.** (a) Topography of a glass surface treated with Glaco and imaged by atomic force microscopy. Courtesy: Philippe Bourrienne. (b) Scanning electron microscopy images of a capillary tube ( $r = 0.51$  mm) coated with Glaco. The coating layer is much thinner than the tube radius.

#### Tilt angle effects in the linear regime of descent

We did experiments with capillary tubes tilted by an angle  $\alpha$  to the vertical, which modifies the acceleration of gravity to  $g \cos \alpha$ . This trick allows us to extend the regime of constant velocity and thus to perform more accurate measurements in the figure 3 of the accompanying paper. We discuss here how the tilt impacts the speed of descent. Two tubes with different dimensions are tested, and the velocity of the meniscus is reported as a function of  $\alpha$  in figure SI-2. We observe that the velocity varies from less than 10% while the gravity is changed by a factor 2, which confirms the independence of  $V$  towards  $\alpha$  predicted by equation 3.

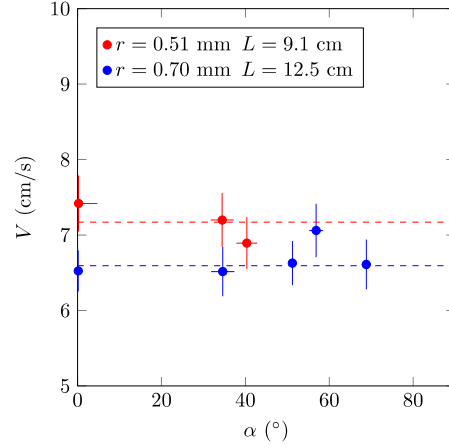

**Figure SI2.** Effects of the tilt angle  $\alpha$  of tubes (radius  $r$ , length  $L$ ) on the capillary descent velocity  $V$ . Dots show experimental results whose average value is indicated with dashed lines. These averaged values are the ones reported in the figure 3 of the accompanying paper.

### ***Relaxation time***

The relaxation time of the meniscus as it reaches its equilibrium depth is obtained by balancing the viscous friction  $F_\eta = -8\pi\eta(L-z)\dot{z}$  with gravity  $F = -\pi r^2 \rho g(z-H)$ . The solution of this equation is  $\ln(1-z/H) - (z-H)/(L-H) = C - t/\tau$  where  $C$  is a constant and  $\tau = 8\eta(L-H)/\rho g r^2$  is the characteristic time of relaxation.

The relaxation time is experimentally obtained by fitting the curves around the equilibrium position (see figure SI3.a). Data in this semi-logarithmic representation indeed align along straight lines, in agreement with the expected exponential relaxation. We deduce from the fits (thin straight lines) the characteristic time  $\tau$  of relaxation, which we plot it in figure SI3.b as a function of the quantity  $(L-H)/(r^2 \cos \alpha)$ , where the set of data was augmented by performing experiments with tubes inclined by an angle  $\alpha$  toward the vertical. All data collapse on a line whose slope ( $7 \times 10^{-7}$  m.s) nicely compares to  $8\eta/\rho g \approx 8 \times 10^{-7}$  m.s, the value expected from the model.

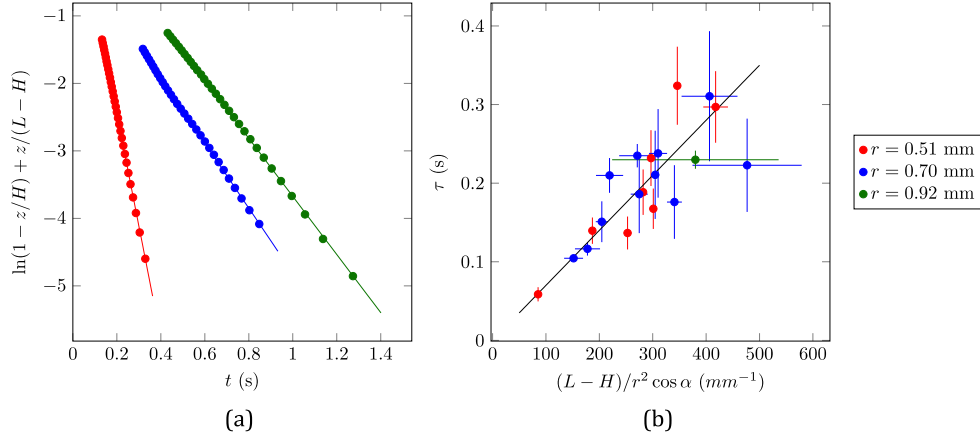

**Figure SI3. (a)** Relaxation stage as a meniscus (position  $z$ ) inside a superhydrophobic tube (length  $L$ ) immersed in water relaxes to its equilibrium depth  $H$ . The lines are linear fits, from which we deduce for each curve the characteristic time  $\tau$  of the relaxation. **(b)** Relaxation time  $\tau$  for menisci in tubes of length  $L$  and radius  $r$  and tilted to the vertical by an angle  $\alpha$ , and plotted as a function of  $(L-H)/r^2 \cos \alpha$ ; the line shows a linear fit of slope  $7 \cdot 10^{-7}$  m.s.

### ***Effects of pressure loss at the exit/entrance of the tube***

Following the analysis developed in É. Lorenceau *et al.*, *Phys. Fluids*, 14, 1985–1992 (2002), an inertial additional term  $F_c = -2\pi r^2 \rho \dot{z}^2$  has to be accounted for when the liquid rises, corresponding to the singular pressure loss associated to a sharp constriction in a pipe. As seen in the figure SI4, this extra term (red dashed line) provides an accurate fit to the data (black dots), significantly better than without this correction (black dashed line).

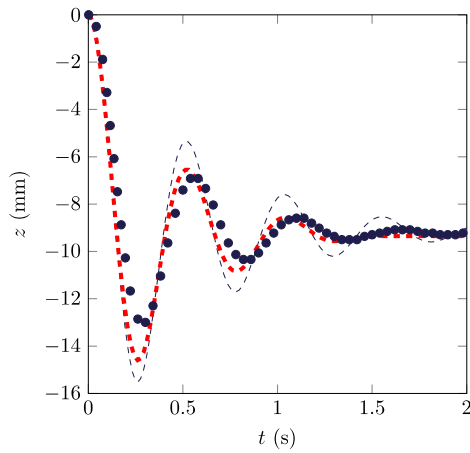

**Figure SI4.** Evolution of the meniscus position for a capillary tube of length  $L = 7.5$  cm and radius  $r = 1.5$  mm. Dots show experimental measurements and dashed lines the numerical integration of the model without (black line) and with (red line) the pressure loss at the tube entrance.
